# Supplementary material
Source: HighWire-hosted journal article supplement (https://erj.ersjournals.com/content/60/1/2200189)
Supplement: inline-supplementary-material-1 [file inline-supplementary-material-1.pdf]

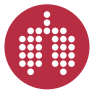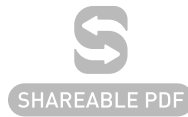

# Lung transplantation in HIV-positive patients: a European retrospective cohort study

Claire Rouzaud<sup>1,2</sup>, Cristina Berastegui<sup>3</sup>, Clément Picard<sup>4</sup>, Robin Vos <sup>5,6</sup>, Laurent Savale <sup>7,8,9</sup>, Xavier Demant<sup>10</sup>, Alessandro Bertani<sup>11</sup>, Erik Verschuuren<sup>12</sup>, Peter Jaksch <sup>13</sup>, Anna Reed<sup>14,15</sup>, Letizia Corinna Morlacchi<sup>16</sup>, Martine Reynaud-Gaubert<sup>17</sup>, Olivier Lortholary<sup>1,2</sup>, Elie Fadel <sup>7,8,18</sup>, Marc Humbert <sup>7,8,9</sup>, Jens Gottlieb <sup>19,21</sup> and Jérôme Le Pavec<sup>7,8,20,21</sup>

<sup>1</sup>Assistance Publique Hôpitaux de Paris, Department of Infectious and Tropical Diseases, Hôpital Necker-Enfants Malades, Paris, France. <sup>2</sup>SAMU Social de Paris, Paris, France. <sup>3</sup>Department of Respiratory Medicine, Lung Transplant Unit, Hospital Universitario Vall d'Hebron, Barcelona, Spain. <sup>4</sup>Service de Transplantation Pulmonaire et Centre de Compétence de la Mucoviscidose, Foch Hospital, Suresnes, France. <sup>5</sup>Department of Respiratory Diseases, University Hospitals Leuven - Gasthuisberg Campus, Leuven, Belgium. <sup>6</sup>Laboratory of Respiratory Diseases and Thoracic Surgery (BREATHE), Department of Chronic Diseases and Metabolism, KU Leuven, Leuven, Belgium. <sup>7</sup>Université Paris-Saclay, Faculté de Médecine, Le Kremlin Bicêtre, France. <sup>8</sup>INSERM UMR\_S 999, Hôpital Marie Lannelongue, Le Plessis Robinson, France. <sup>9</sup>Assistance Publique Hôpitaux de Paris, Service de Pneumologie et Soins Intensifs Respiratoires, Hôpital Bicêtre, Le Kremlin Bicêtre, France. <sup>10</sup>Department of Respiratory Medicine, Haut-Lévêque Hospital, Bordeaux University, Pessac, France. <sup>11</sup>Department of Thoracic Surgery, IRCCS-ISMETT (Mediterranean Institute for Transplantation and Advanced Specialized Therapies), Palermo, Italy. <sup>12</sup>University Medical Center Groningen, Respiratory Diseases and Lung Transplantation, Groningen, The Netherlands. <sup>13</sup>Division of Thoracic Surgery, Medical University of Vienna, Vienna, Austria. <sup>14</sup>Cardiothoracic Transplant Unit, Royal Brompton and Harefield Hospitals, London, UK. <sup>15</sup>Imperial College London, London, UK. <sup>16</sup>Respiratory Unit and Adult Cystic Fibrosis Center, Internal Medicine Department, Fondazione IRCCS Ca' Granda-Ospedale Maggiore Policlinico, Milan, Italy. <sup>17</sup>Service de Pneumologie et Équipe de Transplantation Pulmonaire, Centre Hospitalo-Universitaire Nord, Assistance Publique-Hôpitaux de Marseille, Aix-Marseille Université, Marseille, France. <sup>18</sup>Service de Chirurgie Thoracique et Transplantation Pulmonaire, Hôpital Marie Lannelongue, Groupe Hospitalier Paris-Saint Joseph, Le Plessis-Robinson, France. <sup>19</sup>Department of Respiratory Medicine, Hannover Medical School, Hannover, Germany. <sup>20</sup>Service de Pneumologie et Transplantation Pulmonaire, Hôpital Marie Lannelongue, Groupe Hospitalier Paris-Saint Joseph, Le Plessis-Robinson, France. <sup>21</sup>Contributed equally to this work.

Corresponding author: Jérôme Le Pavec ([lepavec@gmail.com](mailto:lepavec@gmail.com))

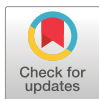

## Shareable abstract (@ERSpublications)

In selected HIV-positive patients, lung transplantation provided good transplant and patient survivals, without more infections than reported in HIV-negative patients. Further work is needed to determine the best immunosuppressive regimens. <https://bit.ly/3kyLnDL>

**Cite this article as:** Rouzaud C, Berastegui C, Picard C, *et al.* Lung transplantation in HIV-positive patients: a European retrospective cohort study. *Eur Respir J* 2022; 60: 2200189 [DOI: 10.1183/13993003.00189-2022].

This single-page version can be shared freely online.

Copyright ©The authors 2022.  
For reproduction rights and  
permissions contact  
[permissions@ersnet.org](mailto:permissions@ersnet.org)

Received: 26 Jan 2022  
Accepted: 19 April 2022

## To the Editor:

Steady progress in antiretroviral therapy, with the introduction of new medications and the earlier institution of more aggressive treatment regimens, has markedly improved the outcomes of HIV infection [1]. The longer life expectancy provided by optimal management is associated with an increased risk of eventually developing chronic medical conditions, including lung diseases and pulmonary arterial hypertension (PAH), many of which can be treated but not cured [2, 3].
